# Supplementary material
Source: PubMed Central journal article supplement (PMC4844860)

## Supplemental Digital Content 1

Table S1. All Invariance Testing Results

|            | Age         |         | Configural       | Sex     |                  |                    |
|------------|-------------|---------|------------------|---------|------------------|--------------------|
|            | Configural* | Metric  |                  | Metric  | Scalar           |                    |
| Parameters |             | 394     | 364 <sup>M</sup> | 266     | 229 <sup>C</sup> | 214 <sup>C,M</sup> |
| $\chi^2$   |             | 1139.3  | 1215.4           | 862.2   | 923.9            | 1004.6             |
| DF         |             | 641     | 671              | 378     | 415              | 430                |
| P value    |             | <.001   | <.001            | <.001   | <.001            | <.001              |
| CFI        |             | .960    | .957             | .960    | .958             | .953               |
| TLI        |             | .944    | .942             | .942    | .945             | .940               |
| RMSEA      |             | .043    | .044             | .045    | .044             | .046               |
| LL         |             | .039    | .040             | .041    | .040             | .042               |
| UL         |             | .047    | .048             | .049    | .048             | .050               |
| SRMR       |             | .049    | .051             | .034    | .038             | .042               |
| AIC        |             | 65683.1 | 65704.4          | 65653.7 | 65670.0          | 65726.6            |
| BIC        |             | 67706.0 | 67573.2          | 67019.4 | 66845.7          | 66825.3            |

*Note.* CFI = Comparative Fit Index, TLI = Tucker Lewis Index, RMSEA = root mean square error of approximation, LL = 90% CI lower limit for RMSEA, UL = 90% CI upper limit for RMSEA, SRMR = standardized root mean square residual, AIC = Akaike Information Criterion, BIC = Bayesian Information Criterion. Age groups were  $\leq 45$  ( $n = 324$ ), 45 to 60 ( $n = 557$ ), and  $>60$  years ( $n = 373$ ) and sex groups were female ( $n = 712$ ) and male ( $n = 542$ ). Invariance was tested for the best fitting, bi-factor model. Continuous age and sex were included as covariates in all models, except sex was omitted as a covariate in the sex invariance model.  $N$  ranged from 1,252 – 1,254 due to missing data. Metric model includes configural and metric invariance, scalar model includes configural, metric, and scalar invariance. Superscripts indicate that a model is statistically significantly different ( $p < .05$ ) from the configural model (C) or from the metric model (M).

\* age configural model did not converge so no estimates are reported.

## Figure Legend

*Figure S1.* Standardized loadings with 95% confidence intervals for the bi-factor model in participants who were female or male are shown from the configural invariance model.

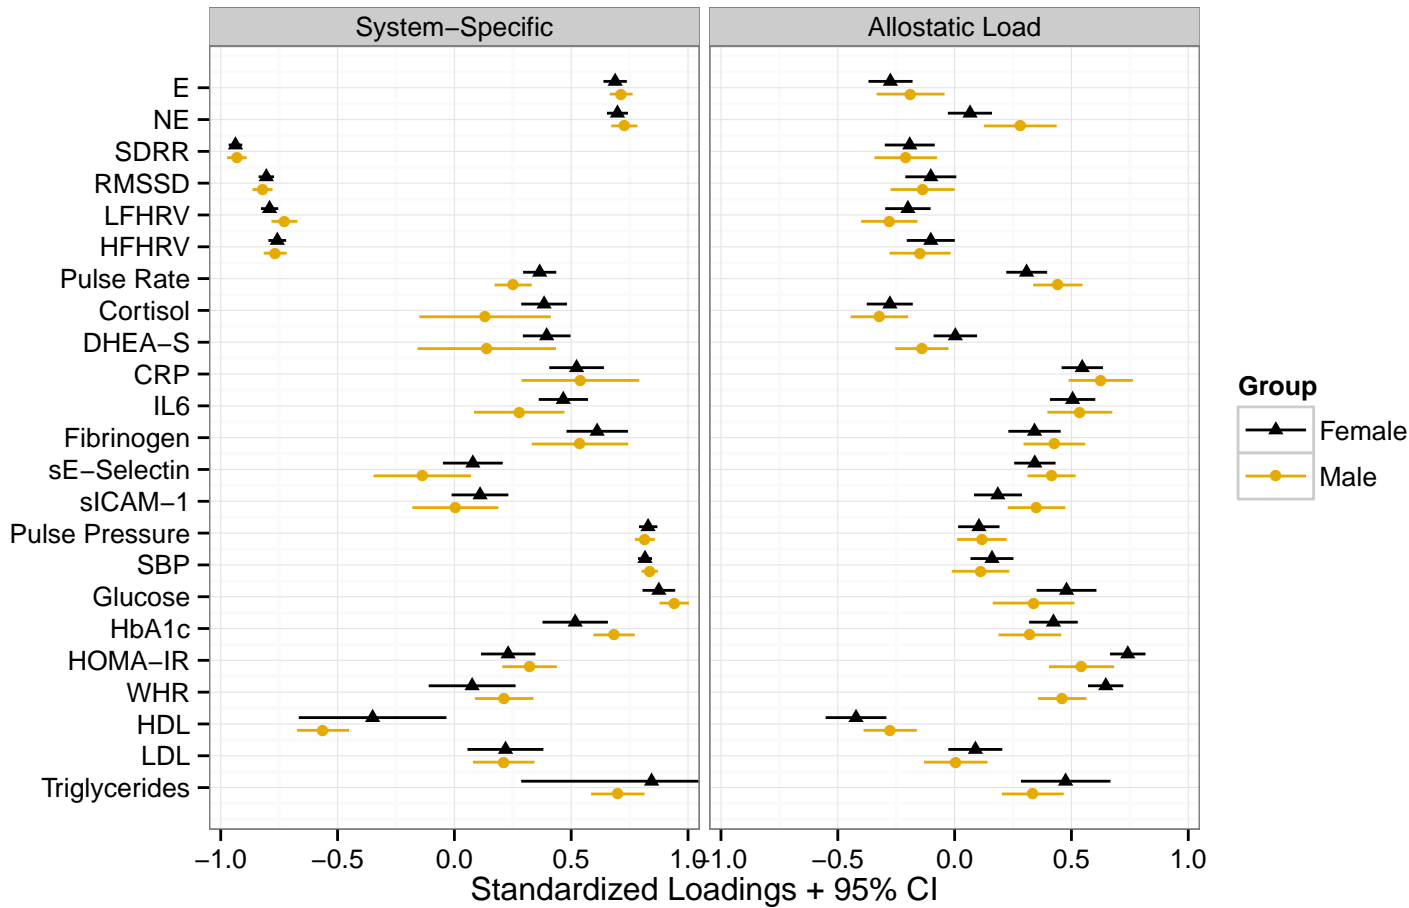

Supplement: NIHMS731903-supplement-FINAL_PRODUCTION_FILE__SDC_1.pdf [file NIHMS731903-supplement-FINAL_PRODUCTION_FILE__SDC_1.pdf]
